# Supplementary material
Source: Springer Nature journal article supplement (https://www.springermedizin.de/resource/supplementary/12884_2013_793_MOESM1_ESM.pdf/9458216)

## Patient identification:

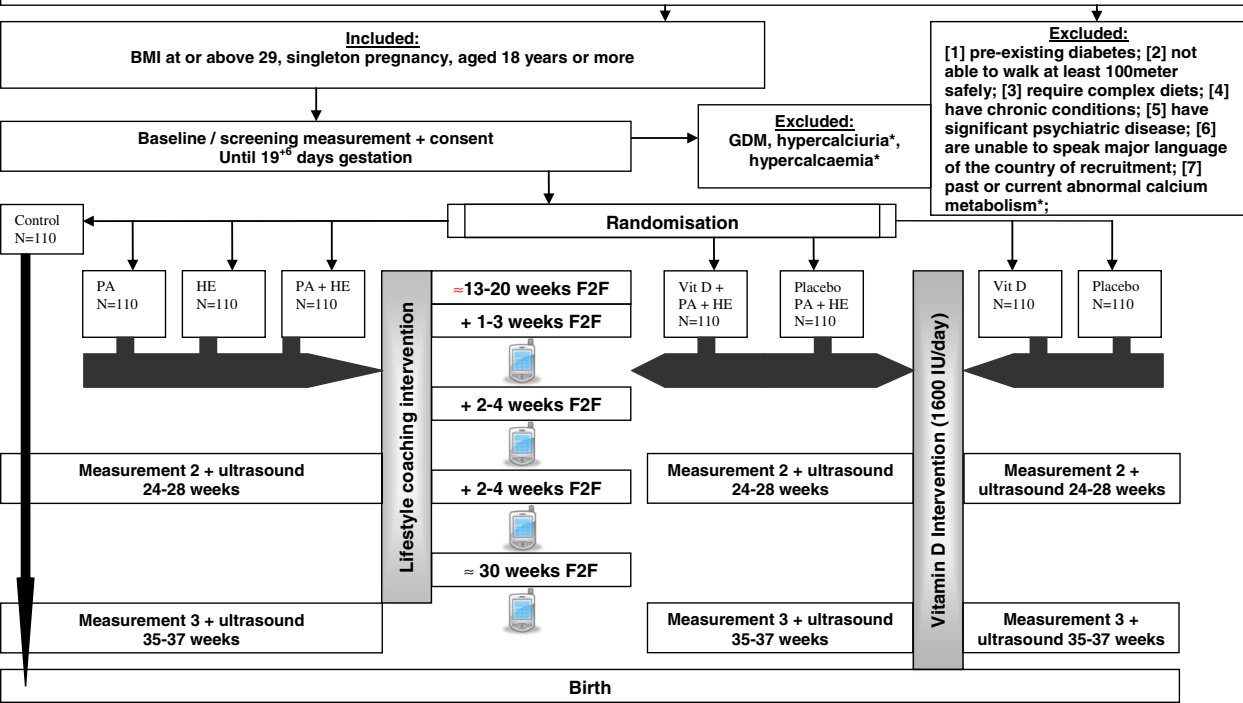

Supplement: MOESM1 [file 9458216]
